# Supplementary material for: Static and dynamic magnetic properties of circular and square cobalt nanodots in hexagonal cells
Source: Royal Society of Chemistry journal article supplement (doi:10.1039/d3cp05432b), 2024-01-01
Supplement: d3cp05432b14.pdf [file d3cp05432b14.pdf]

## Static and dynamic magnetic properties of circular and square cobalt nanodots in hexagonal cells

Franco N. Mélica<sup>a</sup>, Eduardo Saavedra<sup>b</sup>, Juan Escrig<sup>b,c</sup>, Noelia Bajales<sup>d,e</sup>, Omar E. Linarez Pérez<sup>a,f\*</sup>, Diana M. Arciniegas Jaimes<sup>a,f\*\*</sup>

<sup>a</sup>*Universidad Nacional de Córdoba, Facultad de Ciencias Químicas, Departamento de Fisicoquímica, Haya de la Torre esq. Medina Allende, X5000HUA Córdoba, Argentina.*

<sup>b</sup>*Departamento de Física, Universidad de Santiago de Chile (USACH), Av. Víctor Jara 3493, 9170124 Santiago, Chile.*

<sup>c</sup>*Center for the Development of Nanoscience and Nanotechnology (CEDENNA), 9170124 Santiago, Chile.*

<sup>d</sup>*Universidad Nacional de Córdoba, FAMAF, 5000 Córdoba, Argentina.*

<sup>e</sup>*CONICET, IFEG, Av. Medina Allende s/n, 5000 Córdoba, Argentina.*

<sup>f</sup>*CONICET, INFIQC, Haya de la Torre esq. Medina Allende, X5000HUA, Córdoba, Argentina.*

\*olinarez@unc.edu.ar

\*\*diana.arciniegas@unc.edu.ar

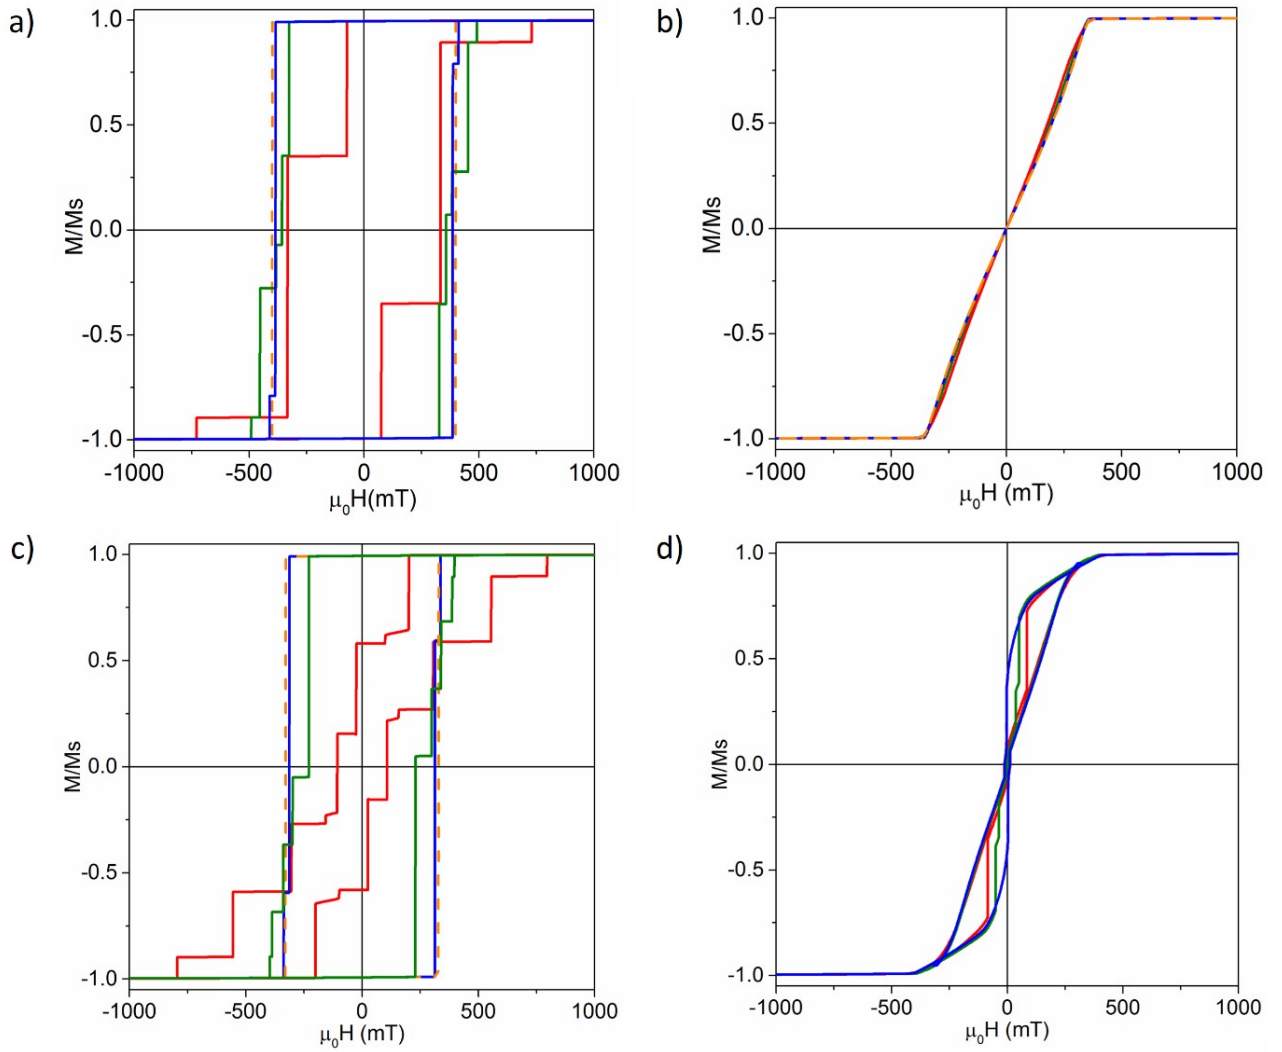

**Figure S1.** Hysteresis curves for a hexagonal cell of nineteen circular nanodots (second-nearest neighbors) when the external magnetic field is applied along **(a)** z-axis and **(b)** x-axis. Hysteresis curves for a hexagonal cell of nineteen square nanodots (second-nearest neighbors) when the external magnetic field is applied along **(c)** z-axis and **(d)** x-axis. For all the curves:  $d_{cc} = 1.25d$  (—),  $1.75d$  (—),  $2.5d$  (—) and  $3d$  (---).

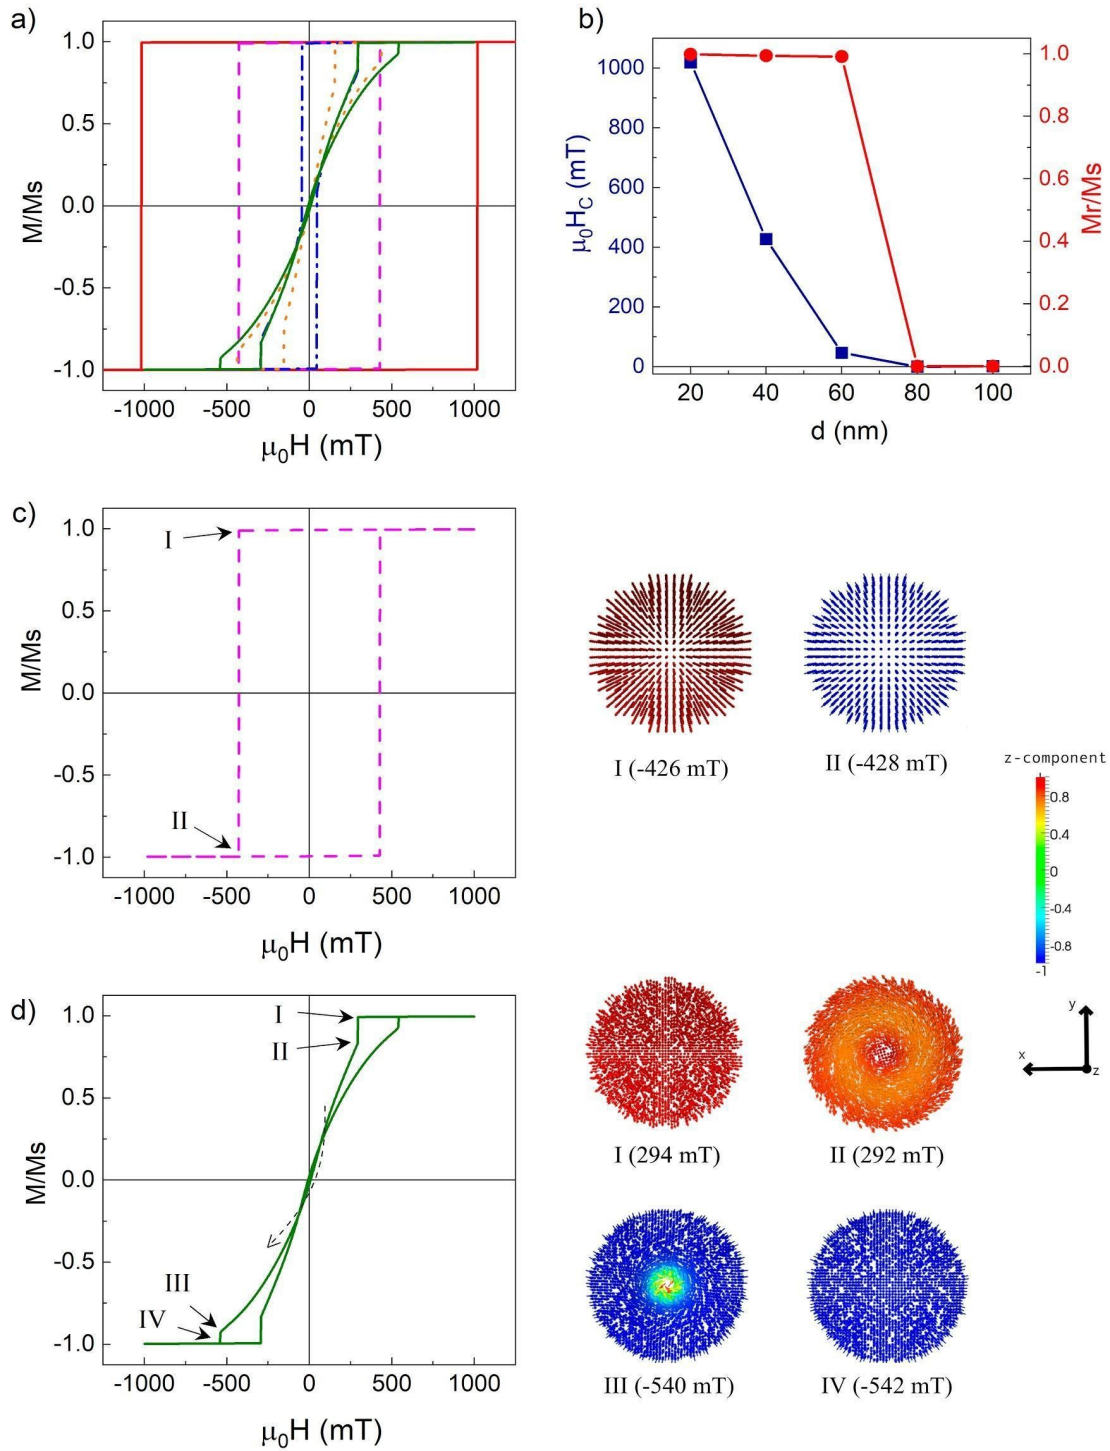

**Figure S2.** (a) Hysteresis curves of an isolated circular nanodot when the external magnetic field is applied along the z-axis. Circular nanodots with diameters of 20 nm (—), 40 nm (---), 60 nm (-·-·-), 80 nm (····) and 100 nm (—) are considered. (b) Coercivity (■) and reduced remanence (●) as a function of nanodot diameter. (c) Hysteresis curve for a 40 nm diameter circular nanodot and snapshots of the magnetization at the point on the hysteresis curve that are highlighted. (d) Hysteresis curve for a 100 nm diameter circular nanodot and snapshots of the magnetization at the point on the hysteresis curve that are highlighted.

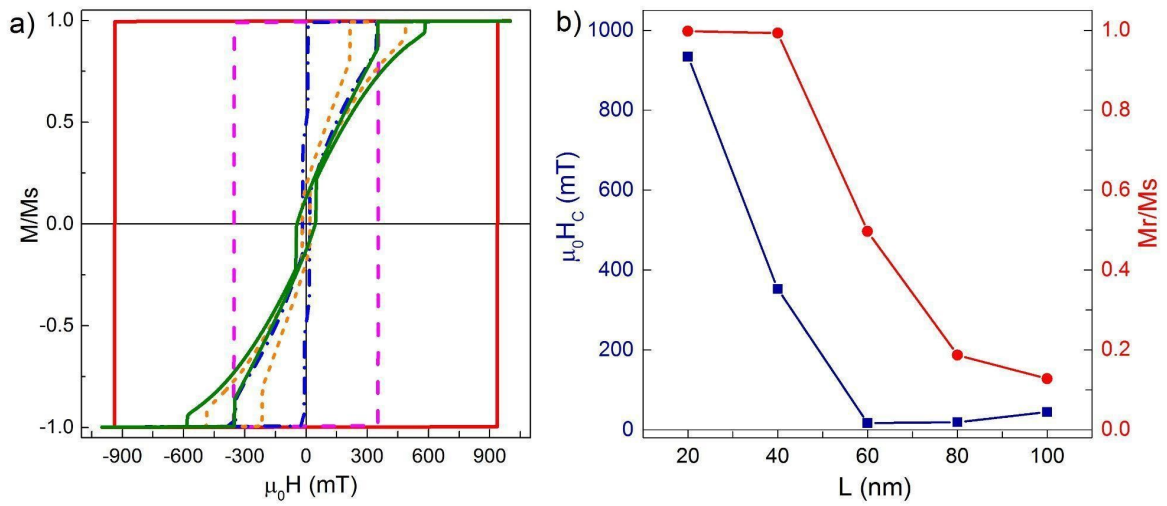

**Figure S3.** (a) Hysteresis curves of an isolated square nanodot when the external magnetic field is applied along the z-axis. Square nanodots with lengths of 20 nm (—), 40 nm (---), 60 nm (-·-·-), 80 nm (····) and 100 nm (—) are considered. (b) Coercivity (■) and reduced remanence (●) as a function of nanodot length.

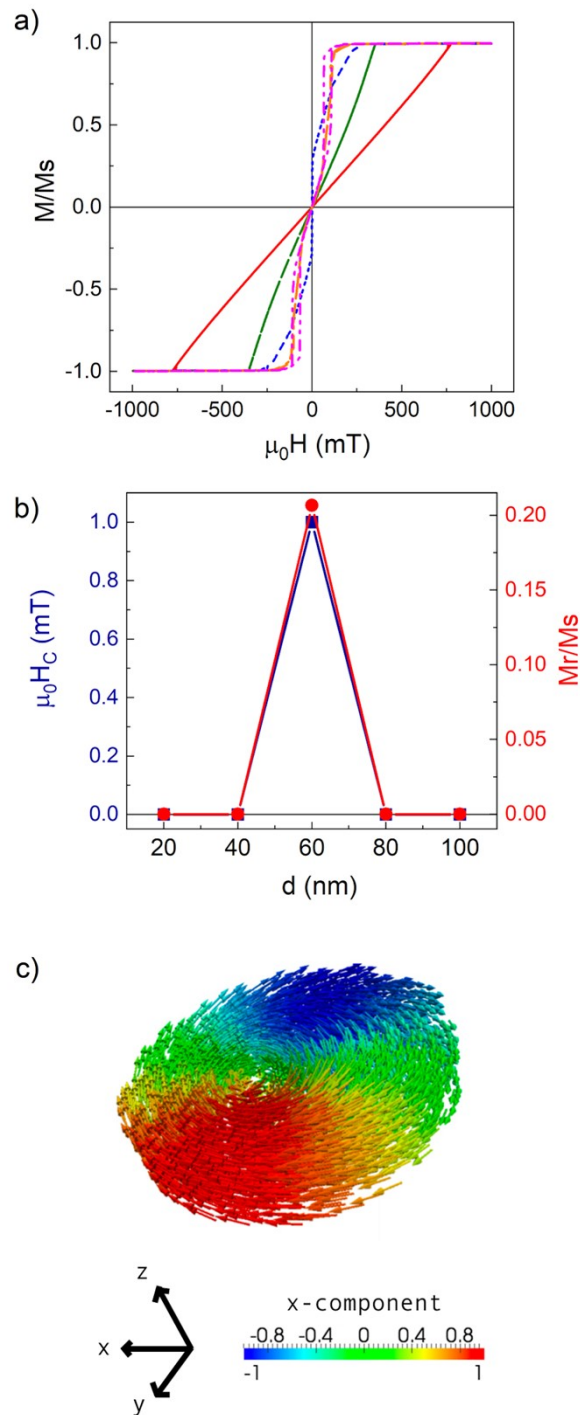

**Figure S4.** (a) Hysteresis curves of an isolated circular nanodot when the external magnetic field is applied along the  $x$ -axis. Circular nanodots with diameters of 20 nm (—), 40 nm (---), 60 nm (·-·-), 80 nm (· · · ·) and 100 nm (—) are considered. (b) Coercivity (■) and reduced remanence (●) as a function of nanodot diameter. (c) Vectorial representation of the magnetic vortex configuration with  $c = -1$  and  $p = +1$  obtained for a 100 nm diameter circular nanodot in the absence of an external magnetic field.

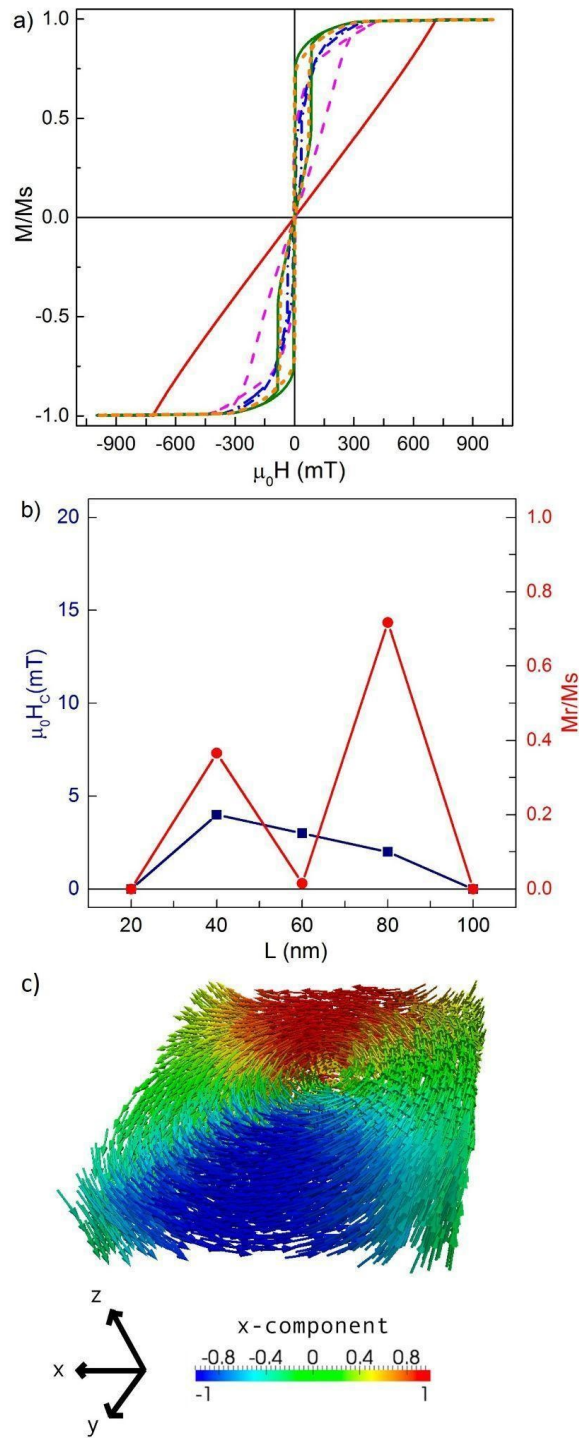

**Figure S5. (a)** Hysteresis curves of an isolated square nanodot when the external magnetic field is applied along the x-axis. Square nanodots with lengths of 20 nm (—), 40 nm (---), 60 nm (-·-·-), 80 nm (·····) and 100 nm (—) are considered. **(b)** Coercivity (■) and reduced remanence (●) as a function of nanodot length. **(c)** Vectorial representation of the magnetic vortex configuration with  $c = -1$  and  $p = +1$  obtained for a 100 nm length square nanodot in the absence of an external magnetic field.

**Table S1:** Resonant frequencies of the circular and square nanodot arrays when a fixed external magnetic field of 1000 mT is applied in the z-direction and a sinc-wave excitation field is applied in the y-direction.

| Center-to-center distance, $d_{cc}$ (nm) | Mode 1 Circle (GHz) | Mode 1a Circle (GHz) | Mode 1 Square (GHz) | Mode 1a Square (GHz) |
|------------------------------------------|---------------------|----------------------|---------------------|----------------------|
| 1.25d                                    | 34.7                | 32                   | 30.25               | 26.35                |
| 1.75d                                    | 37.55               | 36.75                | 34.95               | 33.8                 |
| 2.5d                                     | 38.3                | --                   | 35.95               | --                   |
| 3.0d                                     | 38.6                | --                   | 36.35               | --                   |

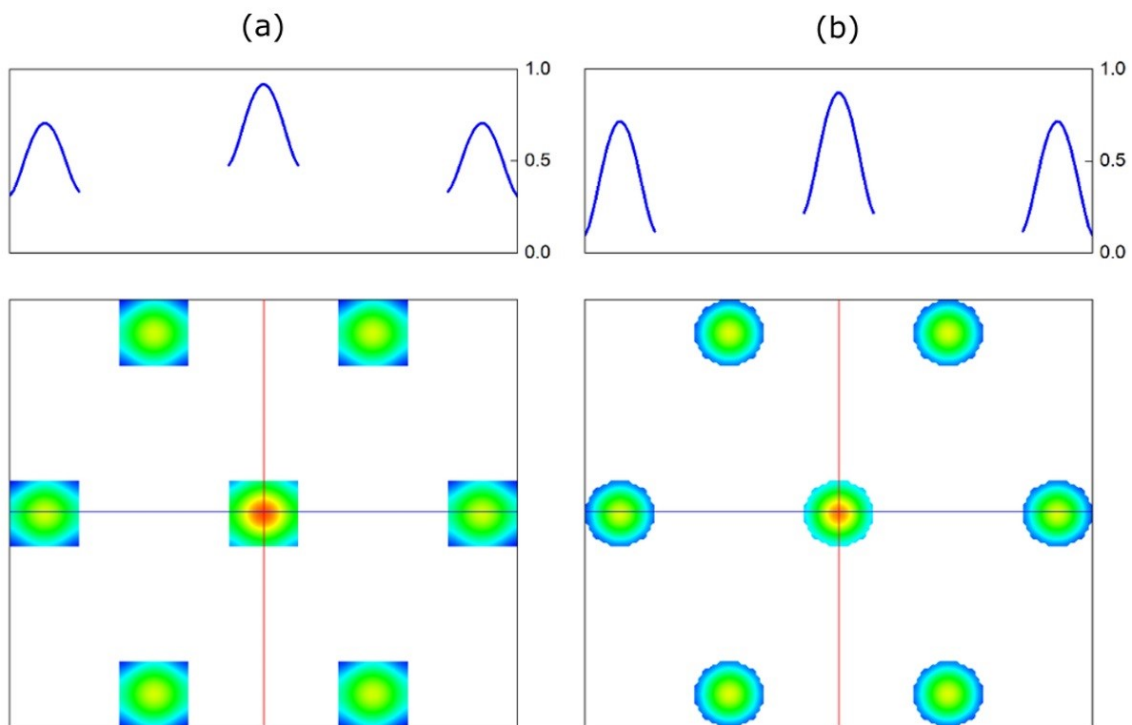

**Figure S6.** Profile of the  $1_s$  and  $1_c$  resonance modes for the (a) square and (b) circular nanodot arrays, when we apply a fixed external magnetic field of 1000 mT in the z-direction and a sinc wave excitation field in the y-direction.

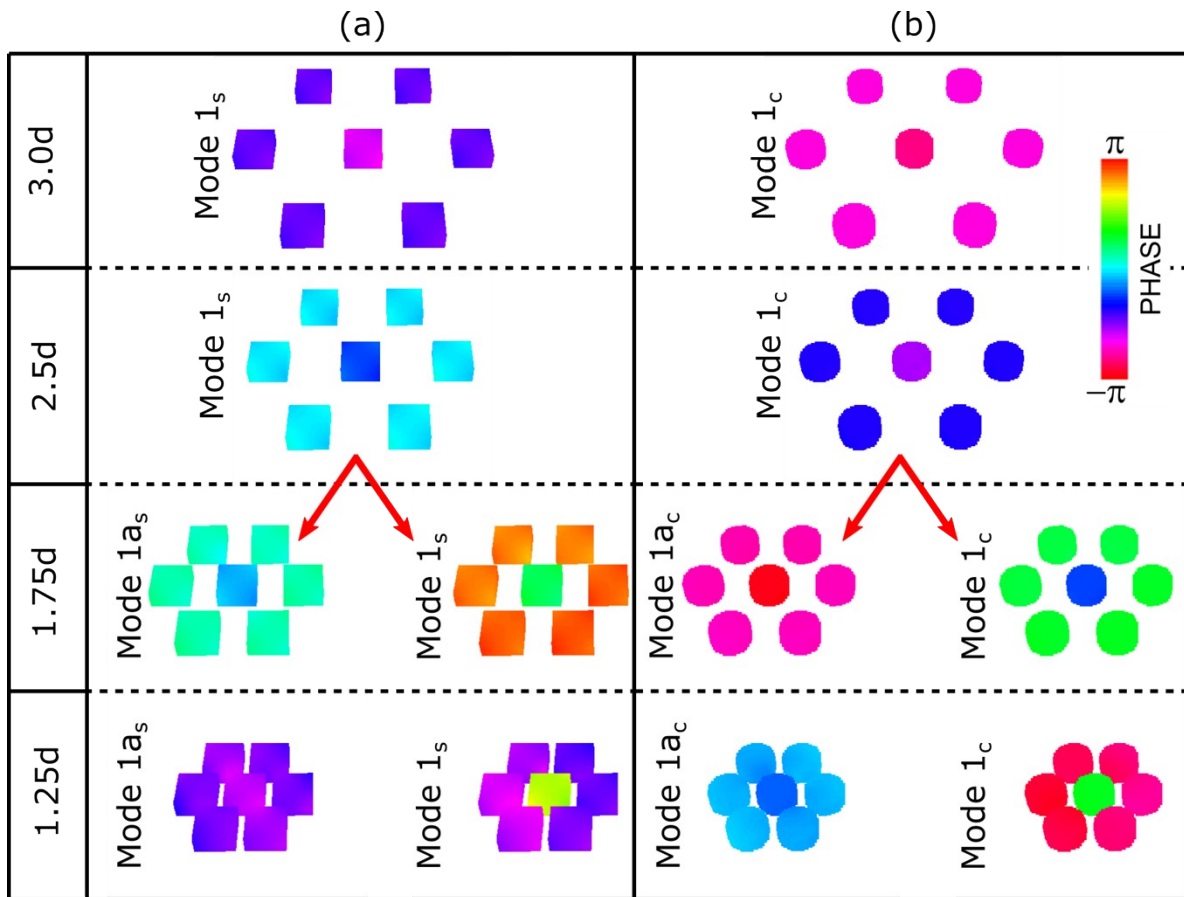

**Figure S7.** Spatial distribution of the phases corresponding to the spectra of the resonant modes for arrays of **(a)** square and **(b)** circular nanodots obtained when a fixed external magnetic field of 1000 mT is applied in the z-direction and a sinc wave excitation field in the y-direction. The rows correspond to different values of center-to-center distance between the nanodots. The color code establishes the phase of the FFT used in the y-component of the magnetizing field.



**Table S2:** Resonant frequencies of the circular and square nanodot arrays when a fixed external magnetic field of 1000 mT is applied in the  $x$ -direction and a sinc-wave excitation field is applied in the  $y$ -direction.

| Center-to-center distance, $d_{cc}$ (nm) | Mode 1 Square (GHz) | Mode 2 Square (GHz) | Mode 1a Square (GHz) | Mode 1b Square (GHz) | Mode 1b_a Square (GHz) | Mode 1b_b Square (GHz) |
|------------------------------------------|---------------------|---------------------|----------------------|----------------------|------------------------|------------------------|
| 1.25d                                    | --                  | 46.2                | 20.9                 | --                   | 23.65                  | 26.55                  |
| 1.75d                                    | --                  | 44.5                | 21.3                 | 23.6                 | --                     | --                     |
| 2.5d                                     | 22.45               | 43.95               | --                   | --                   | --                     | --                     |
| 3.0d                                     | 22.25               | 43.85               | --                   | --                   | --                     | --                     |

  

| Center-to-center distance, $d_{cc}$ (nm) | Mode 1 Circle (GHz) | Mode 2 Circle (GHz) | Mode 1a Circle (GHz) | Mode 1b Circle (GHz) | Mode 1b_a Circle (GHz) | Mode 1b_b Circle (GHz) |
|------------------------------------------|---------------------|---------------------|----------------------|----------------------|------------------------|------------------------|
| 1.25d                                    | --                  | --                  | 23.35                | --                   | 25.65                  | 27.65                  |
| 1.75d                                    | --                  | --                  | 23.1                 | 23.65                | --                     | --                     |
| 2.5d                                     | 22.75               | --                  | --                   | --                   | --                     | --                     |
| 3.0d                                     | 22.55               | --                  | --                   | --                   | --                     | --                     |

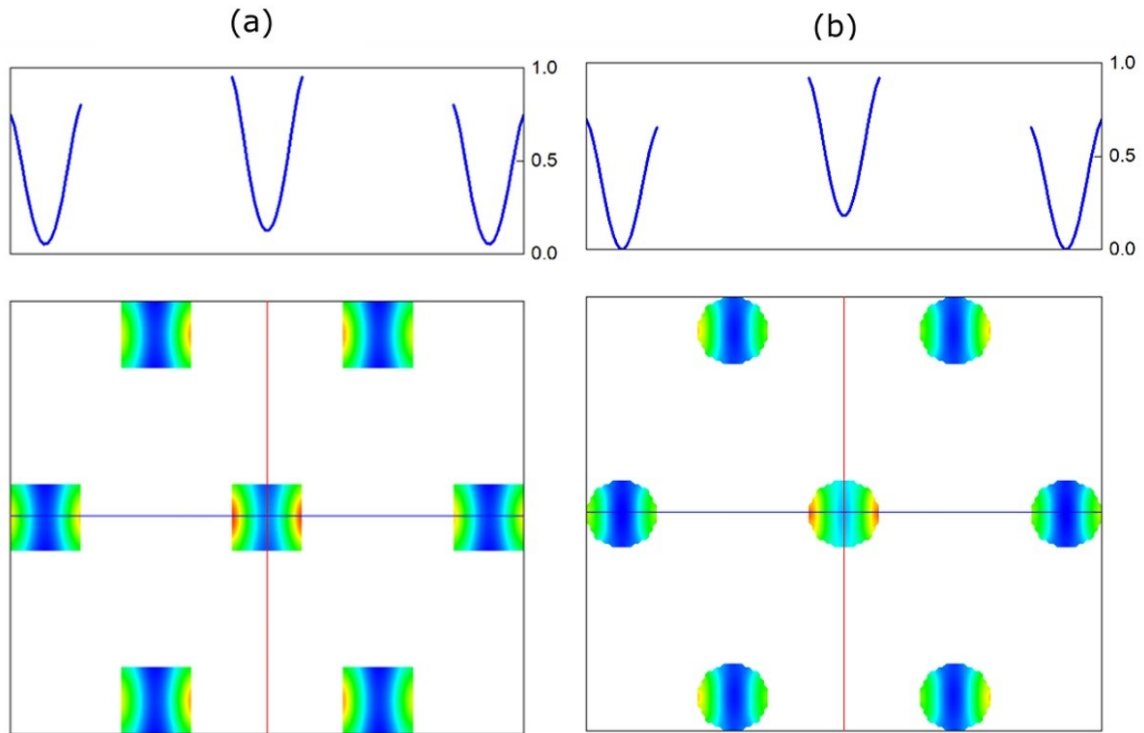

**Figure S8.** Profile of the  $1_s$  and  $1_c$  resonance modes for the (a) square and (b) circular nanodot arrays, respectively, when we apply a fixed external magnetic field of 1000 mT in the  $x$ -direction and a sinc wave excitation field in the  $y$ -direction.

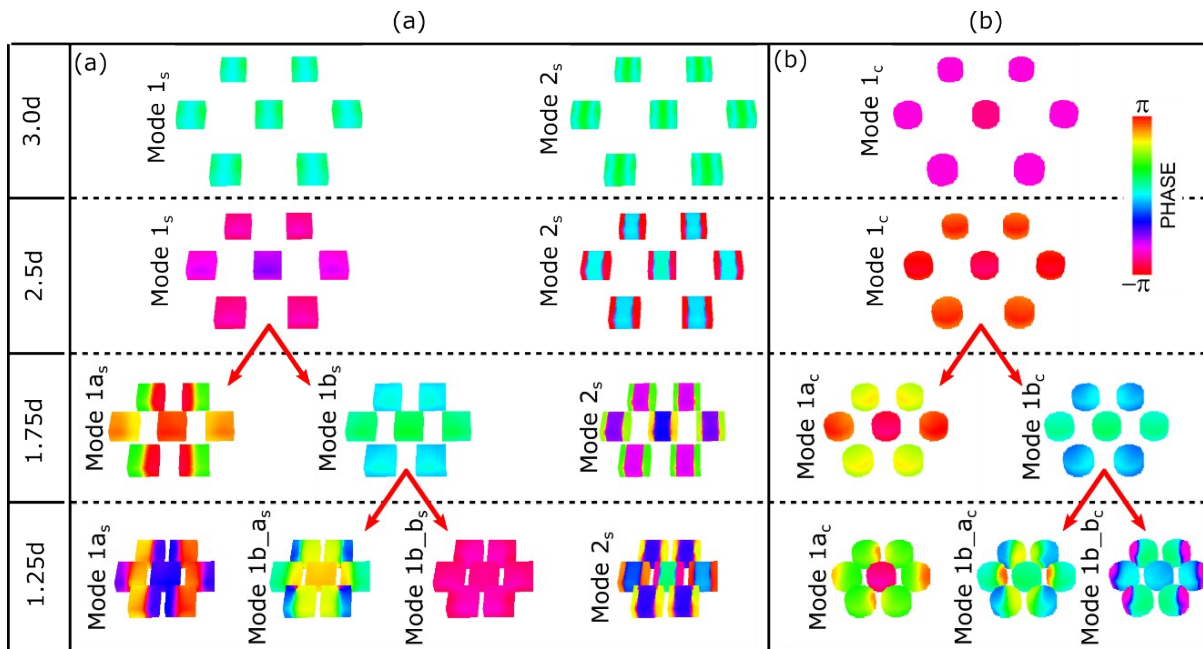

**Figure S9.** Spatial distribution of the phases corresponding to the spectra of the resonant modes for arrays of **(a)** square and **(b)** circular nanodots obtained when a fixed external magnetic field of 1000 mT is applied in the  $x$ -direction and a sinc wave excitation field in the  $y$ -direction. The rows correspond to different values of center-to-center distance between the nanodots. The color code establishes the phase of the FFT used in the  $y$ -component of the magnetizing field.

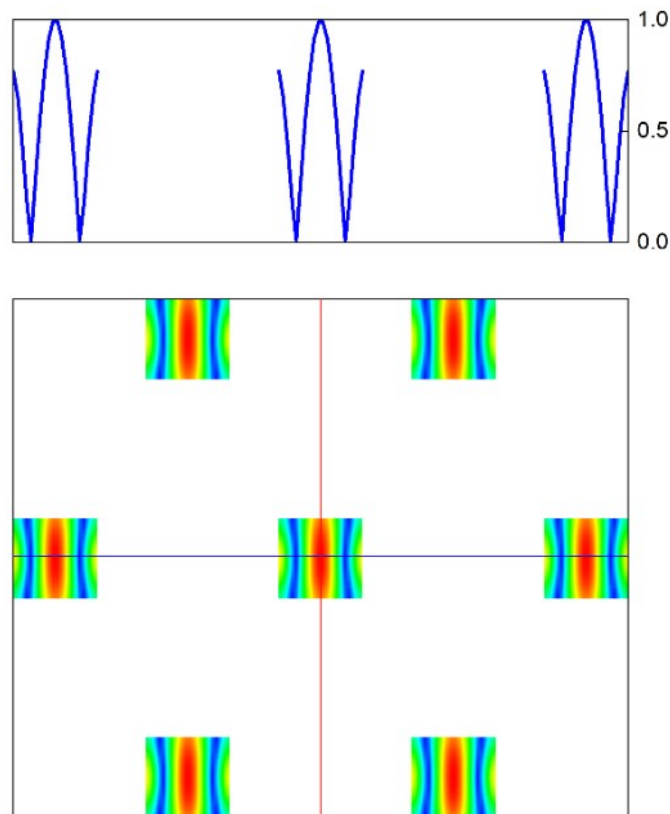

**Figure S10.** Profile of the  $2_s$  resonance mode for the square nanodot arrays when we apply a fixed external magnetic field of 1000 mT in the  $x$ -direction and a sinc wave excitation field in the  $y$ -direction. This profile shows a localized mode with two nodal line.

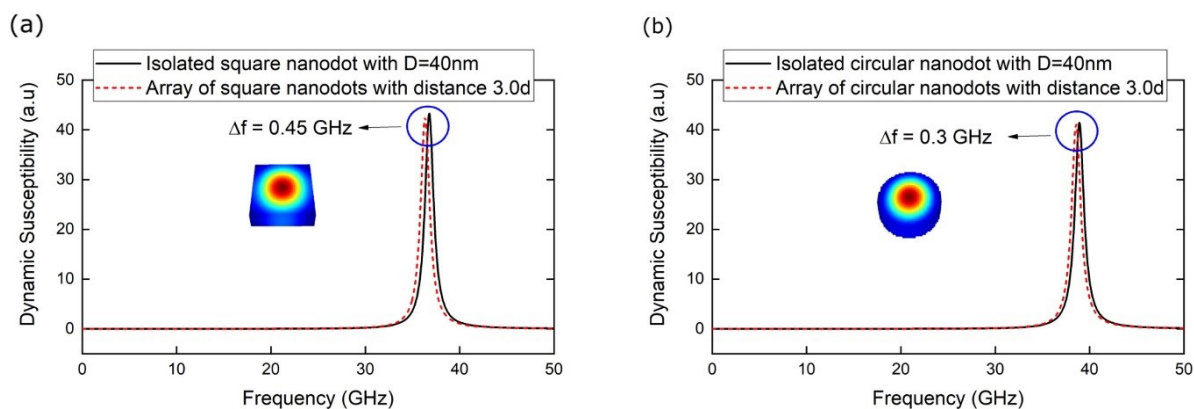

**Figure S11.** Comparison between the dynamic susceptibility measured for an array of nanodots separated at a distance of  $3.0d$  and an isolated nanodot in the presence of a fixed magnetic field of 1000 mT applied along the  $z$ -axis for (a) square and (b) circular nanodots.

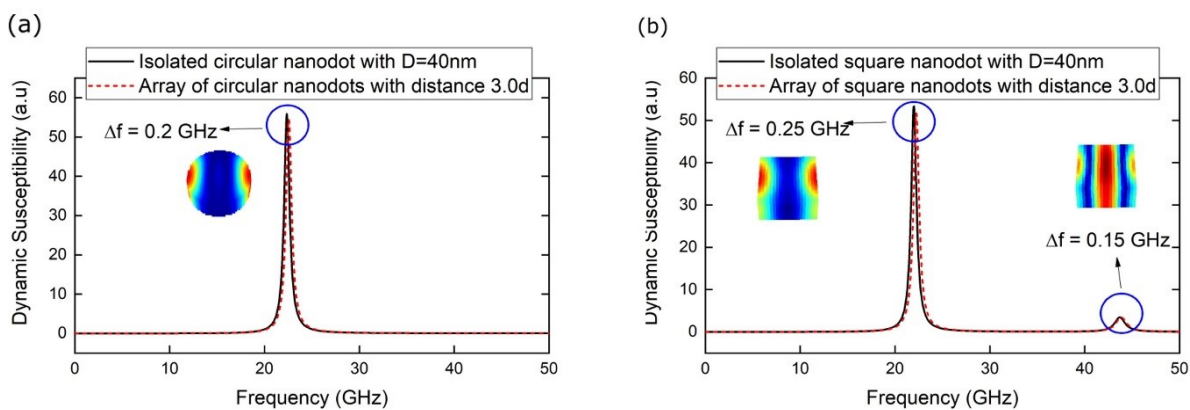

**Figure S12.** Comparison between the dynamic susceptibility measured for an array of nanodots separated at a distance of  $3.0d$  and an isolated nanodot in the presence of a fixed magnetic field of 1000 mT applied along the  $x$ -axis for (a) square and (b) circular nanodots.
