# Supplementary figures and images for: Static and dynamic magnetic properties of circular and square cobalt nanodots in hexagonal cells
Source: Royal Society of Chemistry journal article supplement (doi:10.1039/d3cp05432b), 2024-01-01

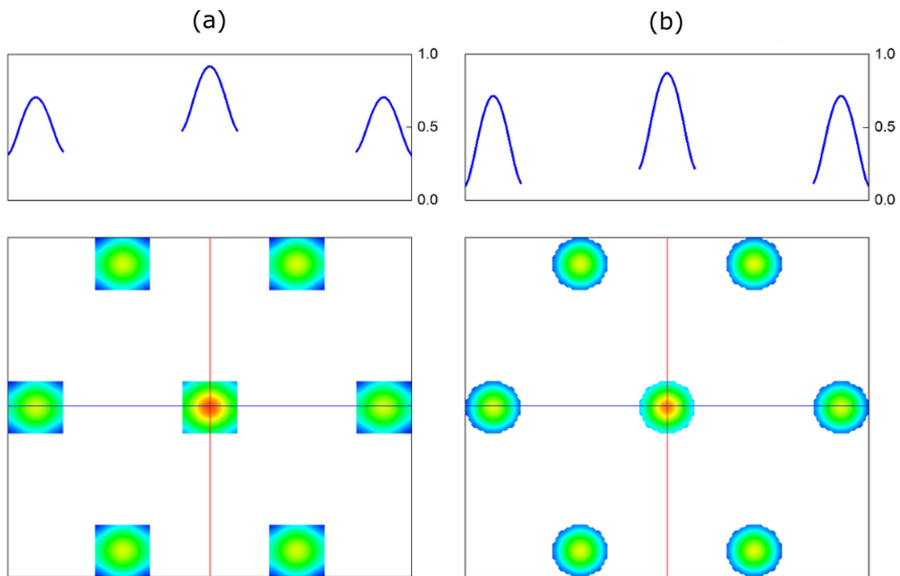

Supplement: d3cp05432b10.pdf [file d3cp05432b10.pdf]

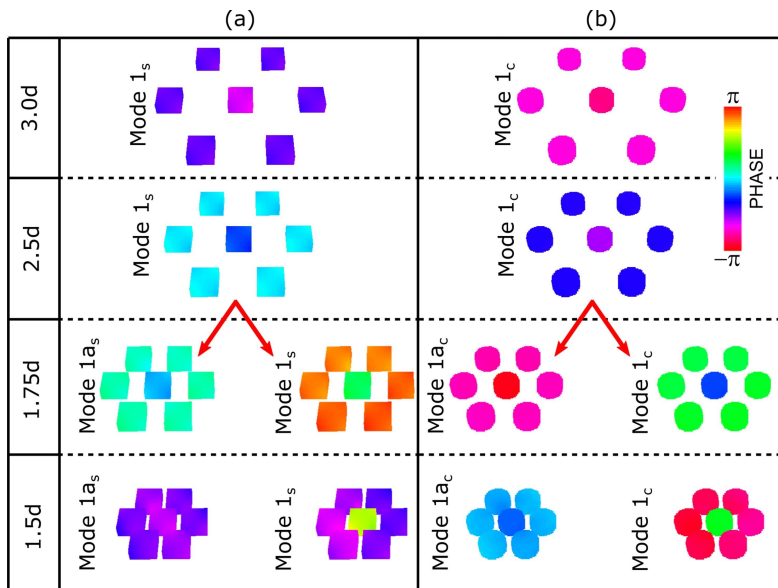

Supplement: d3cp05432b11.pdf [file d3cp05432b11.pdf]

(a)

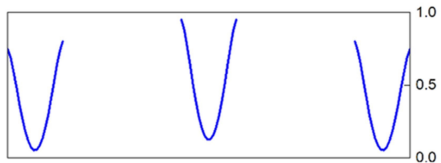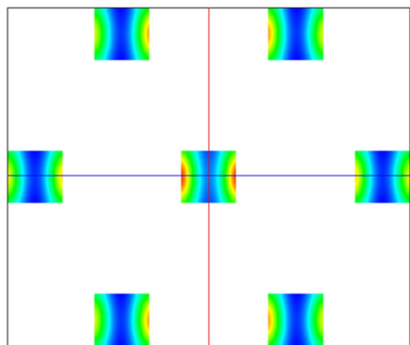

(b)

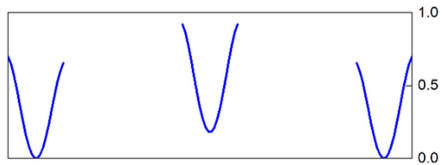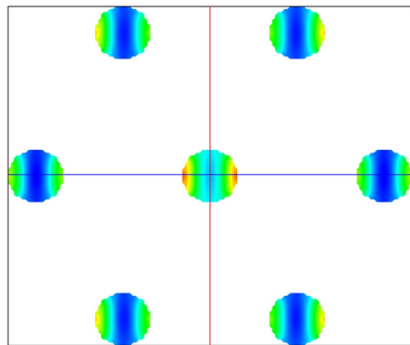

Supplement: d3cp05432b12.pdf [file d3cp05432b12.pdf]

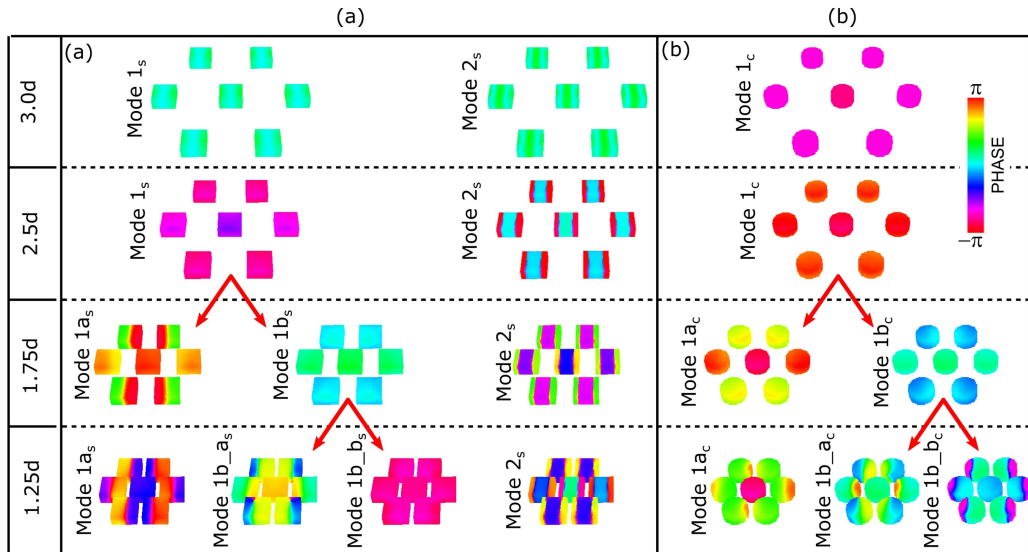

Supplement: d3cp05432b13.pdf [file d3cp05432b13.pdf]

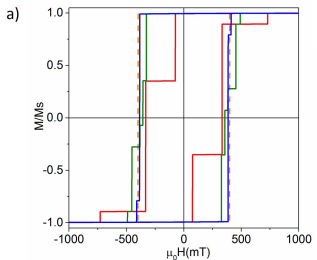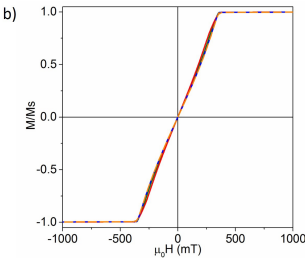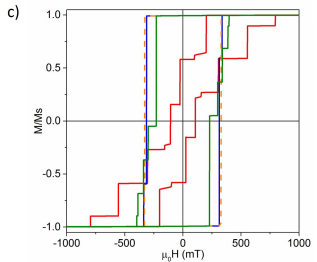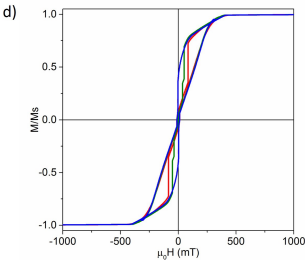

Supplement: d3cp05432b2.pdf [file d3cp05432b2.pdf]

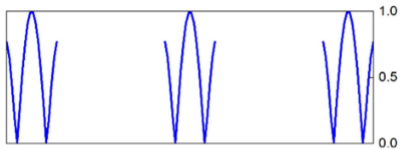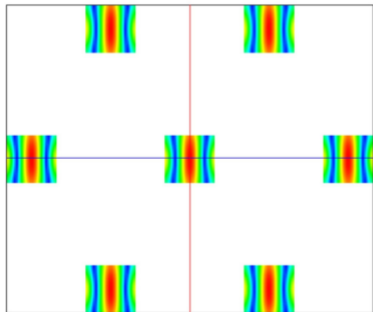

Supplement: d3cp05432b3.pdf [file d3cp05432b3.pdf]

(a)

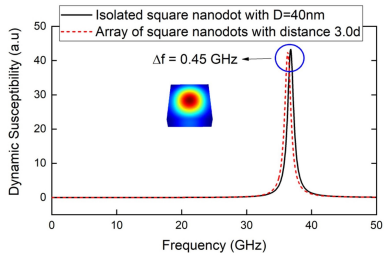

(b)

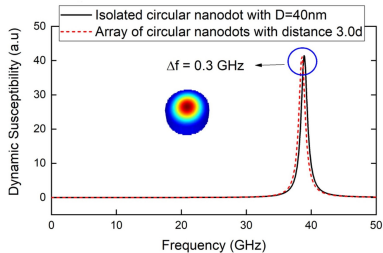

Supplement: d3cp05432b4.pdf [file d3cp05432b4.pdf]

(a)

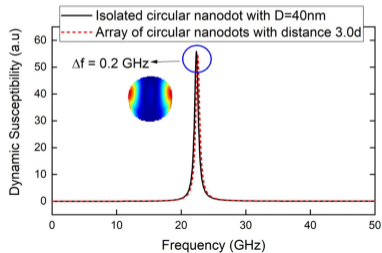

(b)

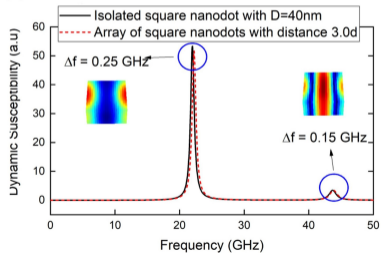

Supplement: d3cp05432b5.pdf [file d3cp05432b5.pdf]

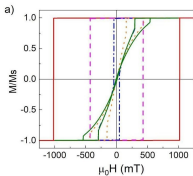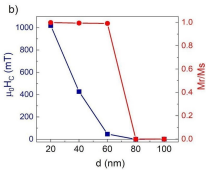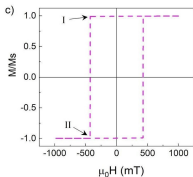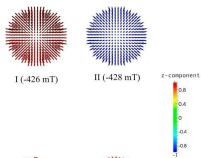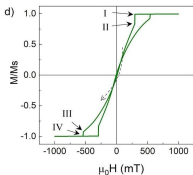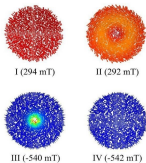

Supplement: d3cp05432b6.pdf [file d3cp05432b6.pdf]

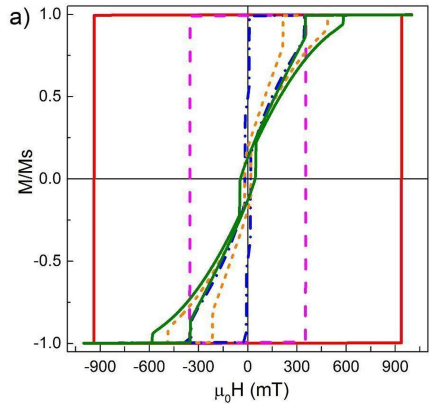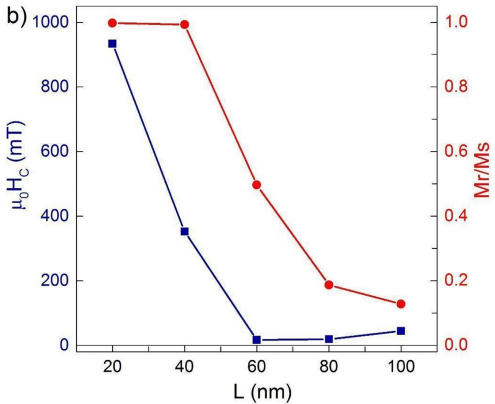

Supplement: d3cp05432b7.pdf [file d3cp05432b7.pdf]

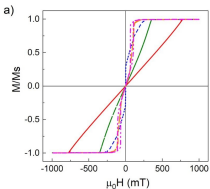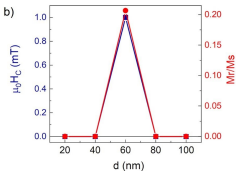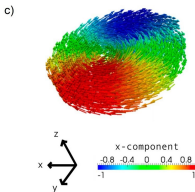

Supplement: d3cp05432b8.pdf [file d3cp05432b8.pdf]

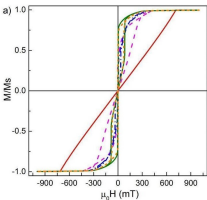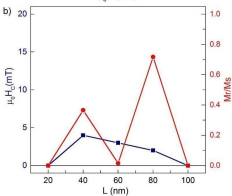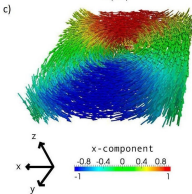

Supplement: d3cp05432b9.pdf [file d3cp05432b9.pdf]
